# Supplementary material for: Predicting Lung Function Using Biomarkers in Alpha-1 Antitrypsin Deficiency
Source: MDPI journal article supplement (doi:10.3390/biomedicines11072001), 2023-07-15
Supplement: s1 [file s1]

## Supplementary material

---

### Table of Contents

|                              |   |
|------------------------------|---|
| Supplementary material ..... | 1 |
| Supplementary results .....  | 2 |
| Tables .....                 | 2 |
| Figures .....                | 9 |

## Supplementary results

---

### Tables

|                           | <b>ZZ-AATD COPD</b> |
|---------------------------|---------------------|
|                           | <b>n=111</b>        |
| <b>Age, years</b>         | 57 [47-65]          |
| <b>Sex, male</b>          | 63 (56.8)           |
| <b>Smoking</b>            |                     |
| Current                   | 2 (1.8)             |
| Ex                        | 82 (74.5)           |
| Never                     | 26 (23.6)           |
| <b>FEV1, litres</b>       | 1.62 [1.17-2.07]    |
| <b>FEV1 % predicted</b>   | 53.8 [35.5-69.6]    |
| <b>FVC, litres</b>        | 3.78 [3.08-4.84]    |
| <b>FVC % predicted</b>    | 98.2 [82.3-112.4]   |
| <b>FEV1/FVC</b>           | 0.43 [0.33-0.53]    |
| <b>TLCO, mmol/min/kPa</b> | 4.84 [3.78-6.38]    |
| <b>TLCO % predicted</b>   | 64.1 [47.9-77.6]    |
| <b>mMRC</b>               |                     |
| 0                         | 7 (10.9)            |
| 1                         | 14 (21.9)           |
| 2                         | 20 (31.2)           |
| 3                         | 15 (23.4)           |
| 4                         | 8 (12.5)            |

**Table S1. Characteristics of ZZ AATD-COPD patients**

COPD, chronic obstructive pulmonary disease; FEV1, forced expiratory volume in 1 second; FVC, forced vital capacity; mMRC, modified Medical Research Council dyspnoea scale.

|                          | COPD (n=124) |        | No COPD (n=76) |       |
|--------------------------|--------------|--------|----------------|-------|
|                          | Median       | IQR    | Median         | IQR   |
| <b>CC16</b> (ng/ml)      | 23.97        | 18     | 27.41          | 17.36 |
| <b>CCL18</b> (ng/ml)     | 172.55       | 107.17 | 124.32         | 80.48 |
| <b>SP-D</b> (ng/ml)      | 8.05         | 7.92   | 6.86           | 5.43  |
| <b>CRP</b> (mg/l)        | 2.54         | 5.22   | 1.07           | 4.48  |
| <b>IL-6</b> (pg/ml)      | 0.53         | 0.53   | 0.52           | 0.45  |
| <b>IL-8</b> (pg/ml)      | 0.43         | 2.31   | 0.74           | 2.64  |
| <b>TNF-alpha</b> (pg/ml) | 0.93         | 1.8    | 0.93           | 2.54  |

**Table S2. Raw biomarker values for AATD patients, with and without COPD.**

CC16, club cell protein 16; CCL18, chemokine ligand 18; SP-D, surfactant protein D; CRP, C-reactive protein; IL-6, interleukin-6; IL-8, interleukin-8; TNF-alpha, tumour necrosis factor alpha.

|                       | FEV1 (n=110)         |       | TLCO (n=98)          |        |
|-----------------------|----------------------|-------|----------------------|--------|
|                       | R <sup>2</sup> =0.08 |       | R <sup>2</sup> =0.22 |        |
|                       | Beta1 (SE1)          | P1    | Beta2 (SE2)          | P2     |
| <b>Age</b>            | -0.008 (0.006)       | 0.233 | -0.076 (0.017)       | <0.001 |
| <b>Male</b>           | 0.287 (0.135)        | 0.036 | 1.347 (0.371)        | <0.001 |
| <b>Ex-smoker</b>      | -0.543 (0.169)       | 0.002 | -0.254 (0.457)       | 0.580  |
| <b>Current smoker</b> | -0.685 (0.518)       | 0.189 | -0.888 (1.346)       | 0.511  |

**Table S3. Multivariable model to predict absolute FEV1 or TLco at baseline in patients with ZZ AATD-COPD (without biomarkers)**

FEV1 or TLco absolute values were modelled using the equation: FEV1 or TLco ~ Age + Sex + Smoking. The beta coefficients (Beta1 and Beta2), standard error (SE1 and SE2), p-values (P1 and P2), adjusted R<sup>2</sup> (R<sup>2</sup>) and number included in each model (n) are presented in the table.

|                       | FEV1 (n=110)         |       | TLCO (n=98)          |       |
|-----------------------|----------------------|-------|----------------------|-------|
|                       | R <sup>2</sup> =0.20 |       | R <sup>2</sup> =0.07 |       |
|                       | Beta1 (SE1)          | P1    | Beta2 (SE2)          | P2    |
| <b>Age</b>            | 0.278 (0.198)        | 0.164 | -0.587 (0.210)       | 0.006 |
| <b>Male</b>           | -8.321 (3.986)       | 0.039 | -5.119 (4.476)       | 0.256 |
| <b>Ex-smoker</b>      | -15.657 (4.752)      | 0.001 | 0.799 (5.104)        | 0.876 |
| <b>Current smoker</b> | -23.222 (14.581)     | 0.114 | -4.183 (15.157)      | 0.783 |
| <b>CC16</b>           | 0.151 (0.153)        | 0.326 | 0.220 (0.166)        | 0.188 |
| <b>CCL18</b>          | -0.038 (0.022)       | 0.087 | -0.038 (0.026)       | 0.140 |
| <b>CRP</b>            | -0.477 (0.575)       | 0.408 | -0.077 (0.609)       | 0.900 |
| <b>IL6</b>            | -0.934 (1.887)       | 0.622 | -1.729 (1.992)       | 0.388 |
| <b>IL8</b>            | -0.701 (0.704)       | 0.322 | 0.763 (0.737)        | 0.303 |
| <b>TNF-alpha</b>      | 2.529 (1.941)        | 0.196 | 1.390 (2.1<0.00167)  | 0.523 |
| <b>SP-D</b>           | <0.001 (<0.001)      | 0.497 | <0.001 (<0.001)      | 0.564 |

**Table S4. Multivariable model to predict FEV1 or TLco percentage predicted at baseline in patients with ZZ AATD-COPD**

FEV1 or TLco percentage predicted values were modelled using the equation:

FEV1 or TLco ~ Age + Sex + Smoking + Biomarkers (CC16 + CCL18 + CRP + IL6 + IL6 + TNF-alpha + SP-D). The beta coefficients (Beta1 and Beta2), standard error (SE1 and SE2), p-values (P1 and P2), adjusted R<sup>2</sup> (R<sup>2</sup>) and number included in each model (n) are presented in the table.

|                       | FEV1 (n=110)         |        | TLCO (n=98)          |       |
|-----------------------|----------------------|--------|----------------------|-------|
|                       | R <sup>2</sup> =0.20 |        | R <sup>2</sup> =0.04 |       |
|                       | Beta1 (SE1)          | P1     | Beta2 (SE2)          | P2    |
| <b>Age</b>            | 0.315 (0.173)        | 0.072  | -0.503 (0.191)       | 0.010 |
| <b>Male</b>           | -7.226 (3.678)       | 0.052  | -2.770 (4.083)       | 0.499 |
| <b>Ex-smoker</b>      | -17.050 (4.586)      | <0.001 | -0.428 (5.035)       | 0.932 |
| <b>Current smoker</b> | -19.552 (14.078)     | 0.168  | -4.319 (14.830)      | 0.772 |

**Table S5. Multivariable model to predict FEV1 or TL<sub>co</sub> percentage predicted at baseline in patients with ZZ AATD-COPD (without biomarkers)**

FEV1 or TL<sub>co</sub> percentage predicted values were modelled using the equation:

FEV1 or TL<sub>co</sub> ~ Age + Sex + Smoking. The beta coefficients (Beta1 and Beta2), standard error (SE1 and SE2), p-values (P1 and P2), adjusted R<sup>2</sup> (R<sup>2</sup>) and number included in each model (n) are presented in the table.

|                       | FEV1 (n=94)          |        | TLC <sub>CO</sub> (n=84) |       |
|-----------------------|----------------------|--------|--------------------------|-------|
|                       | R <sup>2</sup> =0.15 |        | R <sup>2</sup> =0.08     |       |
|                       | Beta1 (SE1)          | P1     | Beta2 (SE2)              | P2    |
| <b>Age</b>            | 3.167 (0.707)        | <0.001 | 0.007 (0.002)            | 0.004 |
| <b>Male</b>           | -4.638 (13.858)      | 0.739  | -0.079 (0.045)           | 0.082 |
| <b>Ex-smoker</b>      | 43.879 (18.178)      | 0.018  | 0.051 (0.058)            | 0.382 |
| <b>Current smoker</b> | 18.699 (67.935)      | 0.784  | -0.005 (0.210)           | 0.981 |

**Table S6. Multivariable model to predict FEV1 and TLC<sub>CO</sub> absolute change in patients with ZZ AATD-COPD (without biomarkers)**

FEV1 (mLs/year) or TLC<sub>CO</sub> (mmol/min/kPa/year) absolute change values were modelled using the equation:

FEV1 or TLC<sub>CO</sub> ~ Age + Sex + Smoking. The beta coefficients (Beta1 and Beta2), standard error (SE1 and SE2), p-values (P1 and P2), adjusted R<sup>2</sup> (R<sup>2</sup>) and number included in each model (n) are presented in the table.

|                       | FEV1 (n=94)          |        | TLCO (n=84)          |       |
|-----------------------|----------------------|--------|----------------------|-------|
|                       | R <sup>2</sup> =0.14 |        | R <sup>2</sup> =0.13 |       |
|                       | Beta1 (SE1)          | P1     | Beta2 (SE2)          | P2    |
| <b>Age</b>            | 0.108 (0.024)        | <0.001 | 0.085 (0.033)        | 0.011 |
| <b>Male</b>           | 0.541 (0.466)        | 0.249  | -0.007 (0.641)       | 0.991 |
| <b>Ex-smoker</b>      | 1.205 (0.567)        | 0.036  | 0.186 (0.748)        | 0.804 |
| <b>Current smoker</b> | 0.343 (2.151)        | 0.874  | -0.477 (2.778)       | 0.864 |
| <b>CC16</b>           | -0.021 (0.017)       | 0.227  | -0.053 (0.023)       | 0.023 |
| <b>CCL18</b>          | 0.001 (0.003)        | 0.565  | -0.005 (0.004)       | 0.236 |
| <b>CRP</b>            | -0.017 (0.066)       | 0.797  | -0.086 (0.088)       | 0.332 |
| <b>IL6</b>            | 0.040 (0.203)        | 0.843  | -0.059 (0.266)       | 0.826 |
| <b>IL8</b>            | -0.120 (0.075)       | 0.114  | 0.123 (0.099)        | 0.219 |
| <b>TNF-alpha</b>      | 0.356 (0.228)        | 0.123  | -0.013 (0.304)       | 0.966 |
| <b>SP-D</b>           | <0.001 (<0.001)      | 0.552  | <0.001 (<0.001)      | 0.442 |

**Table S7. Multivariable model to predict FEV1 and TLco percentage predicted change in patients with ZZ AATD-COPD**

FEV1 or TLco percentage predicted change values were modelled using the equation: FEV1 or TLco ~ Age + Sex + Smoking + Biomarkers (CC16 + CCL18 + CRP + IL6 + IL6 + TNF-alpha + SP-D). The beta coefficients (Beta1 and Beta2), standard error (SE1 and SE2), p-values (P1 and P2), adjusted R<sup>2</sup> (R<sup>2</sup>) and number included in each model (n) are presented in the table.

|                       | FEV1 (n=94)          |        | TLCO (n=84)          |       |
|-----------------------|----------------------|--------|----------------------|-------|
|                       | R <sup>2</sup> =0.14 |        | R <sup>2</sup> =0.02 |       |
|                       | Beta1 (SE1)          | P1     | Beta2 (SE2)          | P2    |
| <b>Age</b>            | 0.090 (0.021)        | <0.001 | 0.068 (0.031)        | 0.029 |
| <b>Male</b>           | 0.270 (0.411)        | 0.513  | -0.482 (0.591)       | 0.417 |
| <b>Ex-smoker</b>      | 1.115 (0.540)        | 0.042  | 0.457 (0.761)        | 0.550 |
| <b>Current smoker</b> | 0.200 (2.017)        | 0.921  | -0.412 (2.753)       | 0.881 |

**Table S8. Multivariable model to predict FEV1 and TL<sub>co</sub> percentage predicted change in patients with ZZ AATD-COPD (without biomarkers)**

FEV1 or TL<sub>co</sub> percentage predicted change values were modelled using the equation: FEV1 or TL<sub>co</sub> ~ Age + Sex + Smoking. The beta coefficients (Beta1 and Beta2), standard error (SE1 and SE2), p-values (P1 and P2), adjusted R<sup>2</sup> (R<sup>2</sup>) and number included in each model (n) are presented in the table.



## Figures

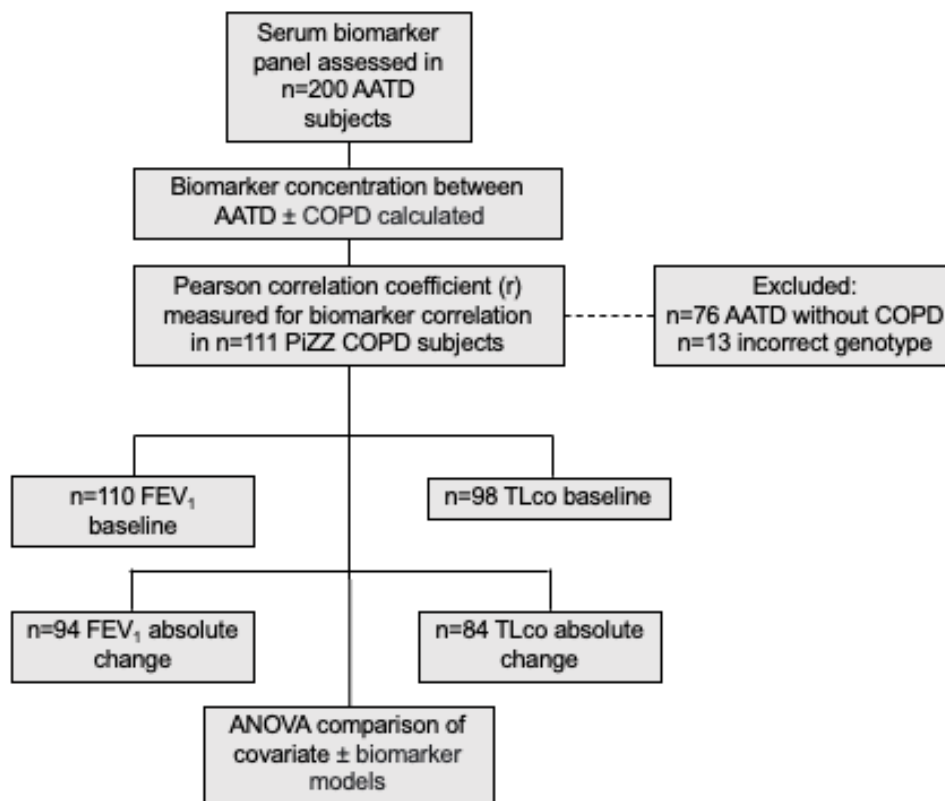

**Figure S1: Study flow chart of biomarker measurement and subsequent statistical analyses.**

The concentrations of a biomarker panel were measured in n=200 subjects with alpha-1 antitrypsin deficiency. Mann-Whitney U test was performed to calculate significance between the concentrations of biomarkers between AATD subjects with and without COPD. Pearson correlation coefficient (r) was measured only for AATD subjects with COPD and the PiZZ genotype (a total of n=111), of which n=110 subjects had a baseline FEV<sub>1</sub> available and n=98 baseline TLco. R was also measured for biomarker correlation with FEV<sub>1</sub> absolute change in n=94 subjects and TLco absolute change in n=84 subjects. The difference in model (covariates alone or covariates plus biomarker panel) was assessed using analysis of variance (ANOVA). AATD – alpha-1 antitrypsin deficiency; COPD – chronic obstructive pulmonary disease; FEV<sub>1</sub> – forced expiratory volume in 1 second; TLco – transfer capacity of the lung for carbon monoxide.

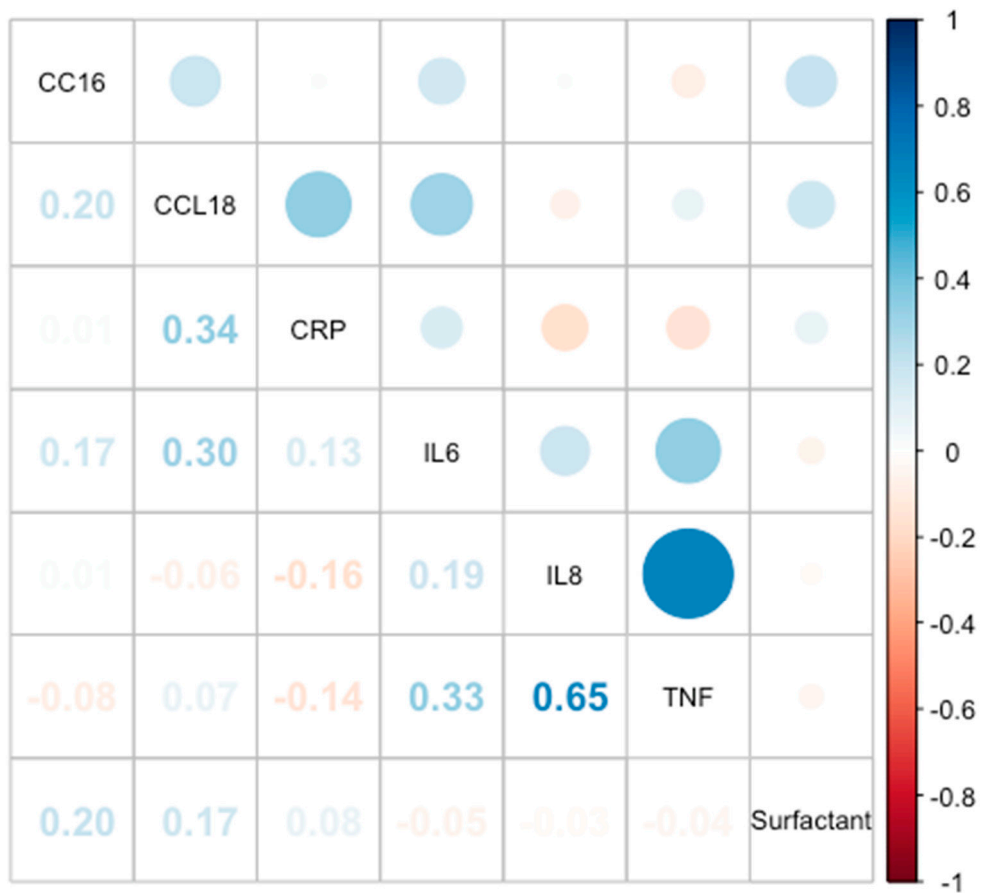

**Figure S2. Biomarker correlation plot**

Biomarker correlation calculated using Pearson correlation coefficient with the coloured scale showing -1 (perfect negative relationship) to 1 (perfect positive relationship)

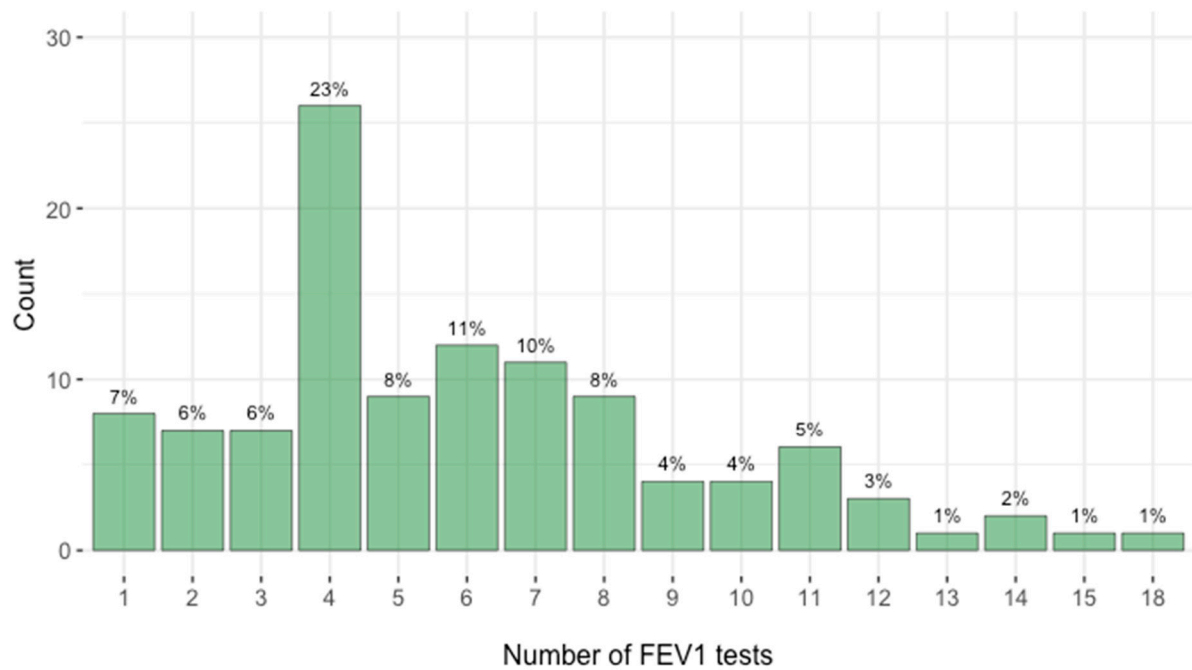

**Figure S3. Histogram of number of FEV1 tests per individual**

Histogram of the number of FEV1 tests available per individual for ZZ AATD-COPD patients.

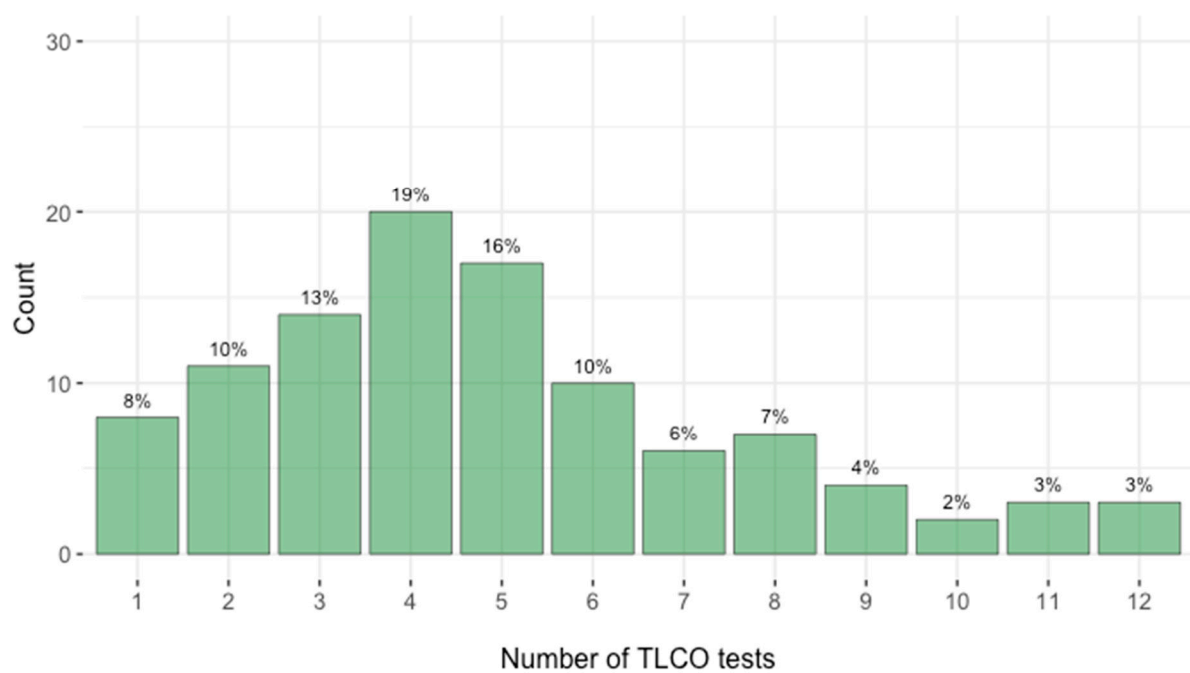

**Figure S4. Histogram of number of TLCO tests per individual**

Histogram of the number of TLCO tests available per individual for ZZ AATD-COPD patients.

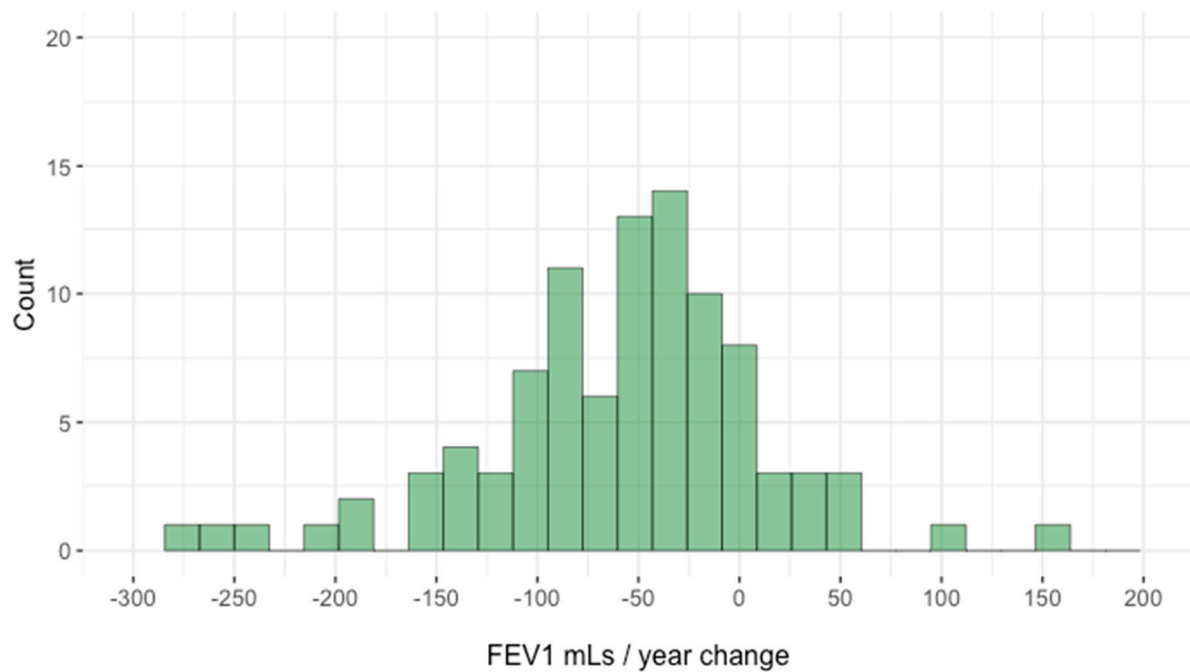

**Figure S5. Histogram of FEV1 absolute change.**

Histogram of the absolute change in FEV1 (mLs / year) for ZZ AATD-COPD patients.

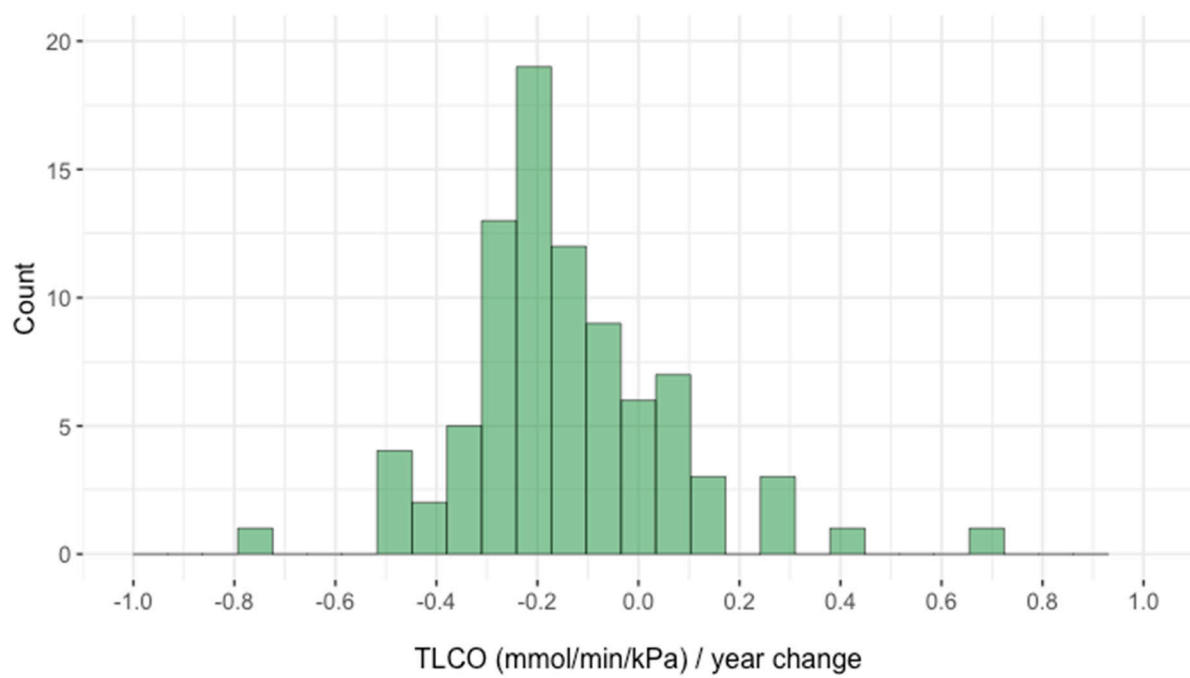

**Figure S6. Histogram of TLCO absolute change.**

Histogram of the absolute change in TLCO (mmol/min/kPa/year) for ZZ AATD-COPD patients.
